# Supplementary material
Source: PubMed Central journal article supplement (PMC5280032)

**Supplemental Figure 1: Proteomic Detection of Lysozyme in Congo Red Positive Intestine Biopsy Specimens.**

(A) Congo red (CR) stained areas in the intestine biopsy specimen (same sample as in Figure 1E) were subjected to LMD-LC-MS/MS using a QExactive mass spectrometer (Thermo-Fisher, Waltham, MA). PreBlank refers to a blank injection to ensure clean analysis of the patient sample. Amyloidogenic lysozyme protein is highlighted with blue star. Proteins highlighted with yellow stars represent universal amyloid markers (PubMed ID:24720917). Numbers in green cells represent total MS/MS matched to the protein of interest in the respective sample. (B) Sequence coverage of lysozyme from sample#1 shows confident detection of the protein with multiple independent and unique peptides. (C) MS/MS spectra showing the peptide containing the mutation p.Leu102Ser. Arrow highlights the location of the mutation and the mutant amino acid. A total of 12 MS/MS spectra were detected for the mutant peptide.

**(A)**

| #                                                                                   | Visible?                            | Starred? | Probability Legend: | Accession Number | Molecular Weight | Protein Grouping Ambiguity | PreBlank | Sample#1 (GI Biopsy) | Sample#2 (GI Biopsy) |
|-------------------------------------------------------------------------------------|-------------------------------------|----------|---------------------|------------------|------------------|----------------------------|----------|----------------------|----------------------|
| <b>Bio View:</b><br><b>Identified Proteins (76/77)</b><br><b>Including 6 Decoys</b> |                                     |          |                     |                  |                  |                            |          |                      |                      |
| 1                                                                                   | <input checked="" type="checkbox"/> | ★        | over 95%            | LYSC_HUM...      | 17 kDa           |                            |          | 121                  | 124                  |
| 2                                                                                   | <input checked="" type="checkbox"/> | ★        | 80% to 94%          | APOA4_HU...      | 45 kDa           |                            |          | 110                  | 112                  |
| 3                                                                                   | <input checked="" type="checkbox"/> | ★        | 50% to 79%          | SAMP_HUM...      | 25 kDa           |                            |          | 38                   | 42                   |
| 4                                                                                   | <input checked="" type="checkbox"/> | ★        | 20% to 49%          | APOE_HUM...      | 36 kDa           |                            |          | 15                   | 21                   |
| 5                                                                                   | <input checked="" type="checkbox"/> | ★        | 0% to 19%           | CO6A3_HU...      | 344 kDa          |                            |          | 103                  | 144                  |
| 6                                                                                   | <input checked="" type="checkbox"/> | ★        |                     | ACTC_HUM...      | 42 kDa           | ★                          |          | 84                   | 92                   |
| 7                                                                                   | <input checked="" type="checkbox"/> | ★        |                     | ALBU_HUM...      | 69 kDa           |                            |          | 59                   | 66                   |
| 8                                                                                   | <input checked="" type="checkbox"/> | ★        |                     | VTNC_HUM...      | 54 kDa           |                            |          | 42                   | 64                   |
| 9                                                                                   | <input checked="" type="checkbox"/> | ★        |                     | CO6A1_HU...      | 109 kDa          |                            |          | 36                   | 40                   |
| 10                                                                                  | <input checked="" type="checkbox"/> | ★        |                     | CO6A2_HU...      | 109 kDa          |                            |          | 30                   | 42                   |

**(B) LYSC\_HUMAN (100%), 16,536.9 Da Sample#1 (GI Biopsy)**

Lysozyme C

9 exclusive unique peptides, 11 exclusive unique spectra, 121 total spectra, 73/148 amino acids (49% coverage)

MKALIVLGLV LLSVTVQGVK FERCELARTL KR LGM DGYRG I SLANW MCLA  
 KWESGYNTRA TNYNAGDRST DYGIFQINSR YWCNDGKTPG AVNACHL SCS  
 ALLQDNIADA VACA KRVVRD PGGIRAWVAW RNRRCQNRDVR QYVQGC GV

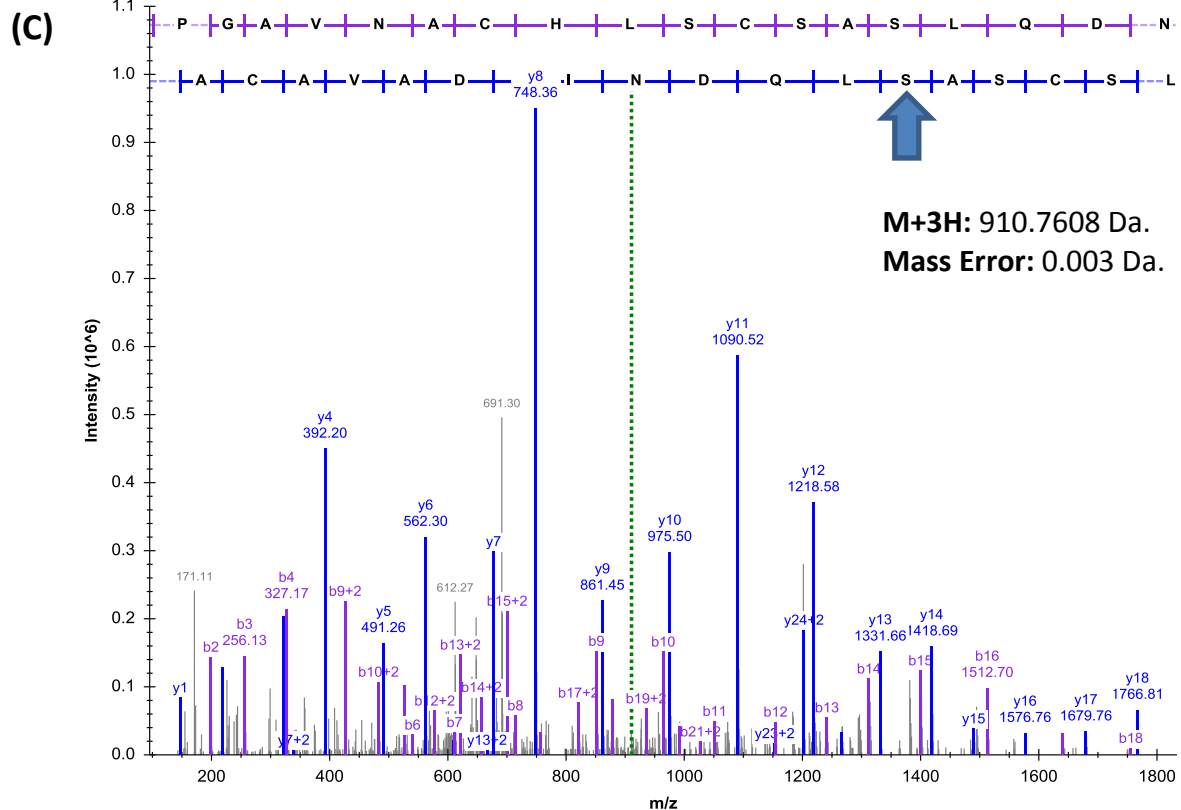

Supplement: ASN.2016090951SupplementaryData.pdf [file ASN.2016090951SupplementaryData.pdf]
